# Supplementary material for: MPDZ promotes DLL4-induced Notch signaling during angiogenesis
Source: eLife journal article supplement (doi:10.7554/elife.32860), 2018-04-05
Supplement: supp [file elife-32860-supp-v1.zip]

Archive with 12 entries (12 files):
- elife_poa_e32860_Figure_7_figure_supplement_1.tif
- elife_poa_e32860_Figure_3_figure_supplement_1.tif
- elife_poa_e32860_Figure_4_figure_supplement_2.tif
- elife_poa_e32860_Figure_1_figure_supplement_1.tif
- elife_poa_e32860_Figure_3_source_data_1.xlsx
- elife_poa_e32860_Transparent_Reporting_File.pdf
- elife_poa_e32860_Figure_1_source_data_1.xlsx
- elife_poa_e32860_Figure_5_source_data_1.xlsx
- elife_poa_e32860_Figure_4_figure_supplement_1.tif
- elife_poa_e32860_Figure_6_source_data_1.xlsx
- elife_poa_e32860_Figure_2_source_data_1.xlsx
- elife_poa_e32860_Figure_7_source_data_1.xlsx
