# Supplementary material for: MPDZ promotes DLL4-induced Notch signaling during angiogenesis
Source: eLife journal article supplement (doi:10.7554/elife.32860), 2018-04-05
Supplement: supp [file elife-32860-supp-v1.zip › elife_poa_e32860_Figure_1_source_data_1.xlsx]

## Sheet: Tabelle1
Figure 1 E
	Hey1	Hey2	Hes1			Hey1	Hey2	Hes1
ctrl	1	1	1		MPDZ	2.7359	4.4628	1.7422
ctrl	1	1	1		MPDZ	1.4285	2.1742	1.2223
ctrl	1	1	1		MPDZ	1.454	2.7299	1.424
ctrl	1	1	1		MPDZ	2.8639	3.2756	1.5868
