# Supplementary material for: MPDZ promotes DLL4-induced Notch signaling during angiogenesis
Source: eLife journal article supplement (doi:10.7554/elife.32860), 2018-04-05
Supplement: supp [file elife-32860-supp-v1.zip › elife_poa_e32860_Figure_2_source_data_1.xlsx]

## Sheet: Tabelle1
Figure 2 A
	Hey1	Hey2	Hes1			Hey1	Hey2	Hes1
sh-ctrl	1	1	1		sh-MPDZ	0.5236	0.6856	0.6536
sh-ctrl	1	1	1		sh-MPDZ	0.5971	0.7094	0.8843
sh-ctrl	1	1	1		sh-MPDZ	0.3431	0.8343	0.7942
sh-ctrl	1	1			sh-MPDZ	0.1169	0.6906
Figure 2 B
	Cre-	Cre+			Cre-	Cre+
Hey1	1	0.7223		Hey2	1	0.5228
Hey1	1	0.4034		Hey2	1	0.5502
Hey1	1	0.7932		Hey2	1	0.6393
