# Supplementary material for: MPDZ promotes DLL4-induced Notch signaling during angiogenesis
Source: eLife journal article supplement (doi:10.7554/elife.32860), 2018-04-05
Supplement: supp [file elife-32860-supp-v1.zip › elife_poa_e32860_Figure_3_source_data_1.xlsx]

## Sheet: Tabelle1
Figure 3 A
	full length	-PDZ			full length	-PDZ
Dll1	100	91.0898		Dll4	100	78.1654
Dll1	100	78.1318		Dll4	100	73.3876
Dll1	100	89.7974		Dll4	100	82.6768
Figure 3 B
	WT	KO
Dll4	19.39	19.35
Dll4	24.28	16.56
Dll4	22.94	11.16
Dll4	26.1254	16.7974
