# Supplementary material for: MPDZ promotes DLL4-induced Notch signaling during angiogenesis
Source: eLife journal article supplement (doi:10.7554/elife.32860), 2018-04-05
Supplement: supp [file elife-32860-supp-v1.zip › elife_poa_e32860_Figure_5_source_data_1.xlsx]

## Sheet: Tabelle1
Figure 5 A
	Basal	VEGF-A			Basal	VEGF-A
shctrl	100	125.927		shMPDZ	173.998	325.594
shctrl	100	125.762		shMPDZ	283.184	327.354
shctrl	100	115.501		shMPDZ	187.96	270.026
shctrl	100	208.964		shMPDZ	257.44	314.263
Figure 5 B
	Basal	VEGF-A			Basal	VEGF-A
ctrl	100	152.781		MPDZ	98.8748	108.023
ctrl	100	152.166		MPDZ	70.5841	129.423
ctrl	100	130.045		MPDZ	76.2485	116.048
ctrl	100	169.286		MPDZ	40.5636	80.2865
ctrl	100	137.004		MPDZ	47.4274	76.3762
Figure 5 C
	ctrl	MPDZ			ctrl	MPDZ
basal	54.1667	45.8333		VEGF	63.3663	36.6337
basal	59.2233	40.7767		VEGF	54.6875	45.3125
basal	69.0801	30.9199		VEGF	62.3146	37.6854
	sh-ctrl	sh-MPDZ			sh-ctrl	sh-MPDZ
basal	32.9654	67.0346		VEGF	42.5354	57.4646
basal	35.0649	64.9351		VEGF	48.6364	51.3636
basal	40.4545	59.5455		VEGF	48.1085	51.8915
