# Supplementary material for: MPDZ promotes DLL4-induced Notch signaling during angiogenesis
Source: eLife journal article supplement (doi:10.7554/elife.32860), 2018-04-05
Supplement: supp [file elife-32860-supp-v1.zip › elife_poa_e32860_Figure_6_source_data_1.xlsx]

## Sheet: Tabelle1
Figure 6 A
	WT	KO
	0.2011	0.3975
	0.4109	0.6597
	0.3215	0.5407
	0.2882	0.4417
Figure 6 C
	WT	KO			WT	KO
branches	503.667	699.333		junctions	301	414
	505	739.333			302.667	430
	381.333	652.333			221	387.667
	272	488.333			146	283.667
	298	531			162.667	307.333
	224.667	477.333			126.333	268
	254.333				138
