# Supplementary material for: MPDZ promotes DLL4-induced Notch signaling during angiogenesis
Source: eLife journal article supplement (doi:10.7554/elife.32860), 2018-04-05
Supplement: supp [file elife-32860-supp-v1.zip › elife_poa_e32860_Figure_7_source_data_1.xlsx]

## Sheet: Tabelle1
Figure 7 D: microvessel density
	Cre-	Cre+			Cre-	Cre+
B16F10	42.8	45		LLC	49.6	81.8
	13	50.2			52	71.75
	25	35			46.8	86
	30.8	35.6			51.4	69.2
	17.2	41.2			56.6	72.2
	40.8	41				88.6
		37.2
	28.2667	40.7429			51.28	78.2583
Figure 7 F
	Cre-	Cre+			Cre-	Cre+
B16F10	2.12	35.97		LLC	1.473	19.967
	2.26	26.56			2.6388	28.8474
	0.64475	55.01			2.569	16.4194
	0.7338	27.27			4.8418	14.2894
	0.5744	4.92				23.8908
	0.0746	1.46				42.9412
	1.13	1.72
		9.37
