# Supplementary figures and images for: MPDZ promotes DLL4-induced Notch signaling during angiogenesis
Source: eLife journal article supplement (doi:10.7554/elife.32860), 2018-04-05

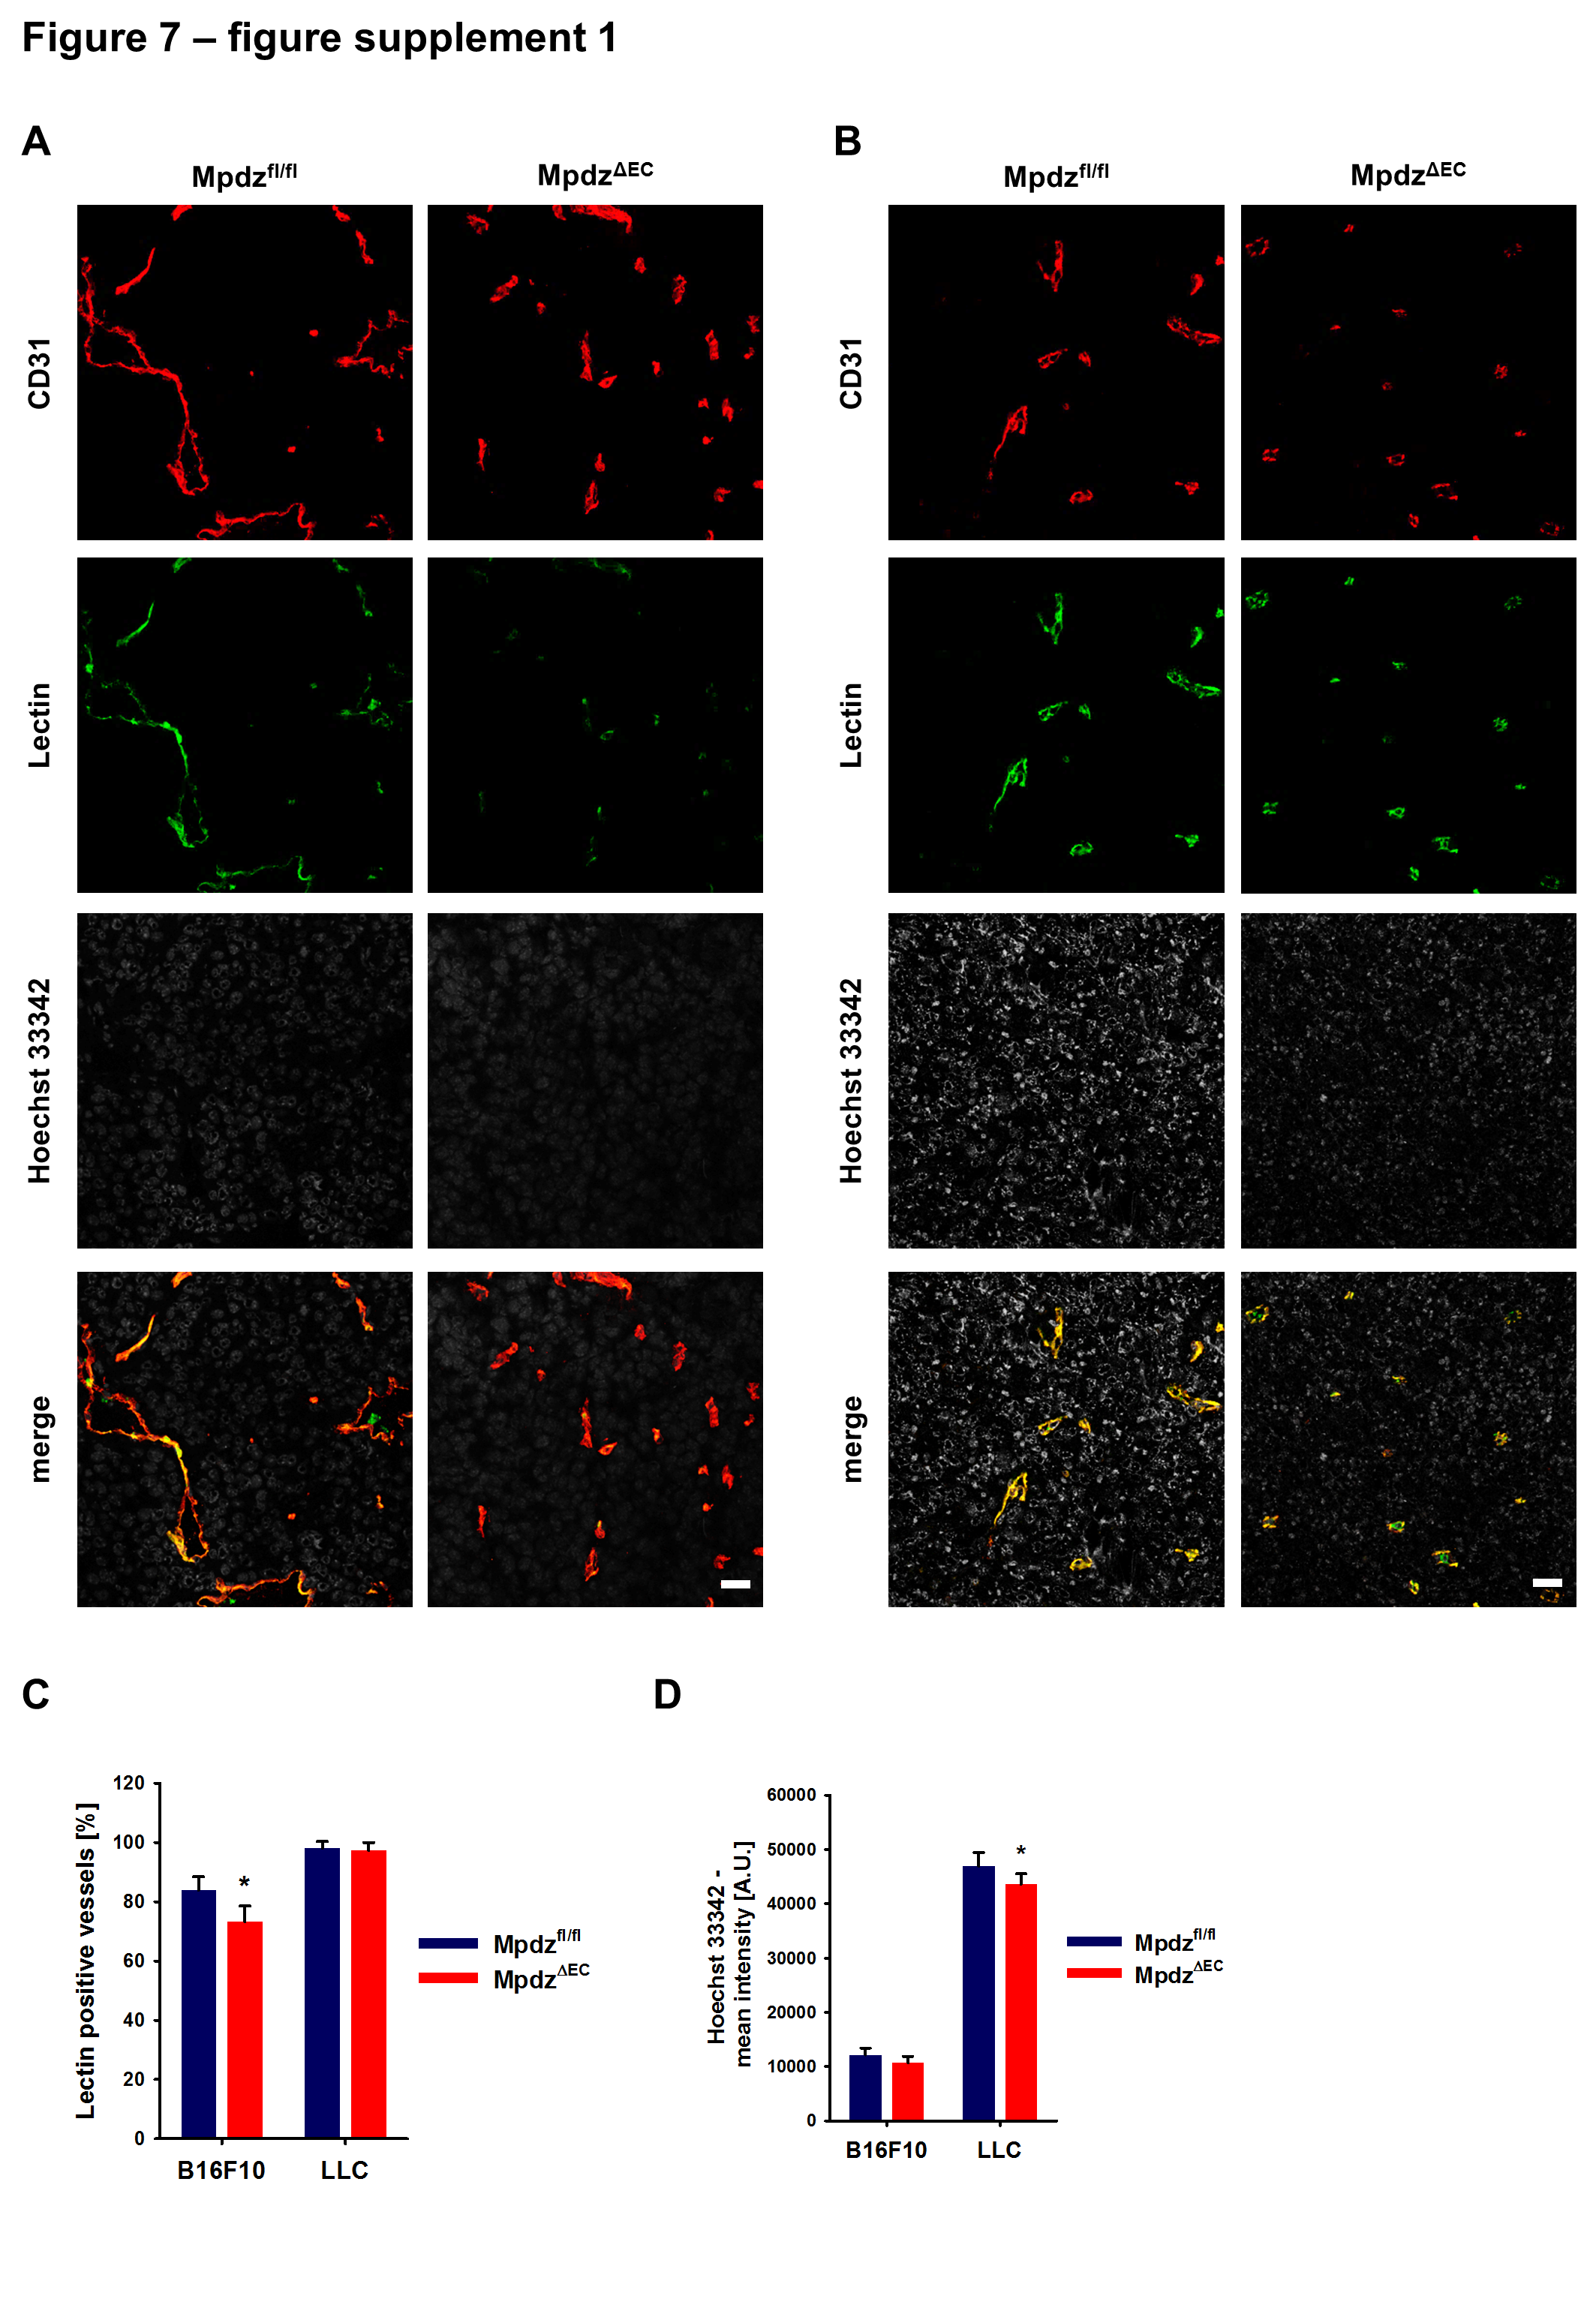

Supplement: supp [file elife-32860-supp-v1.zip › elife_poa_e32860_Figure_7_figure_supplement_1.tif]

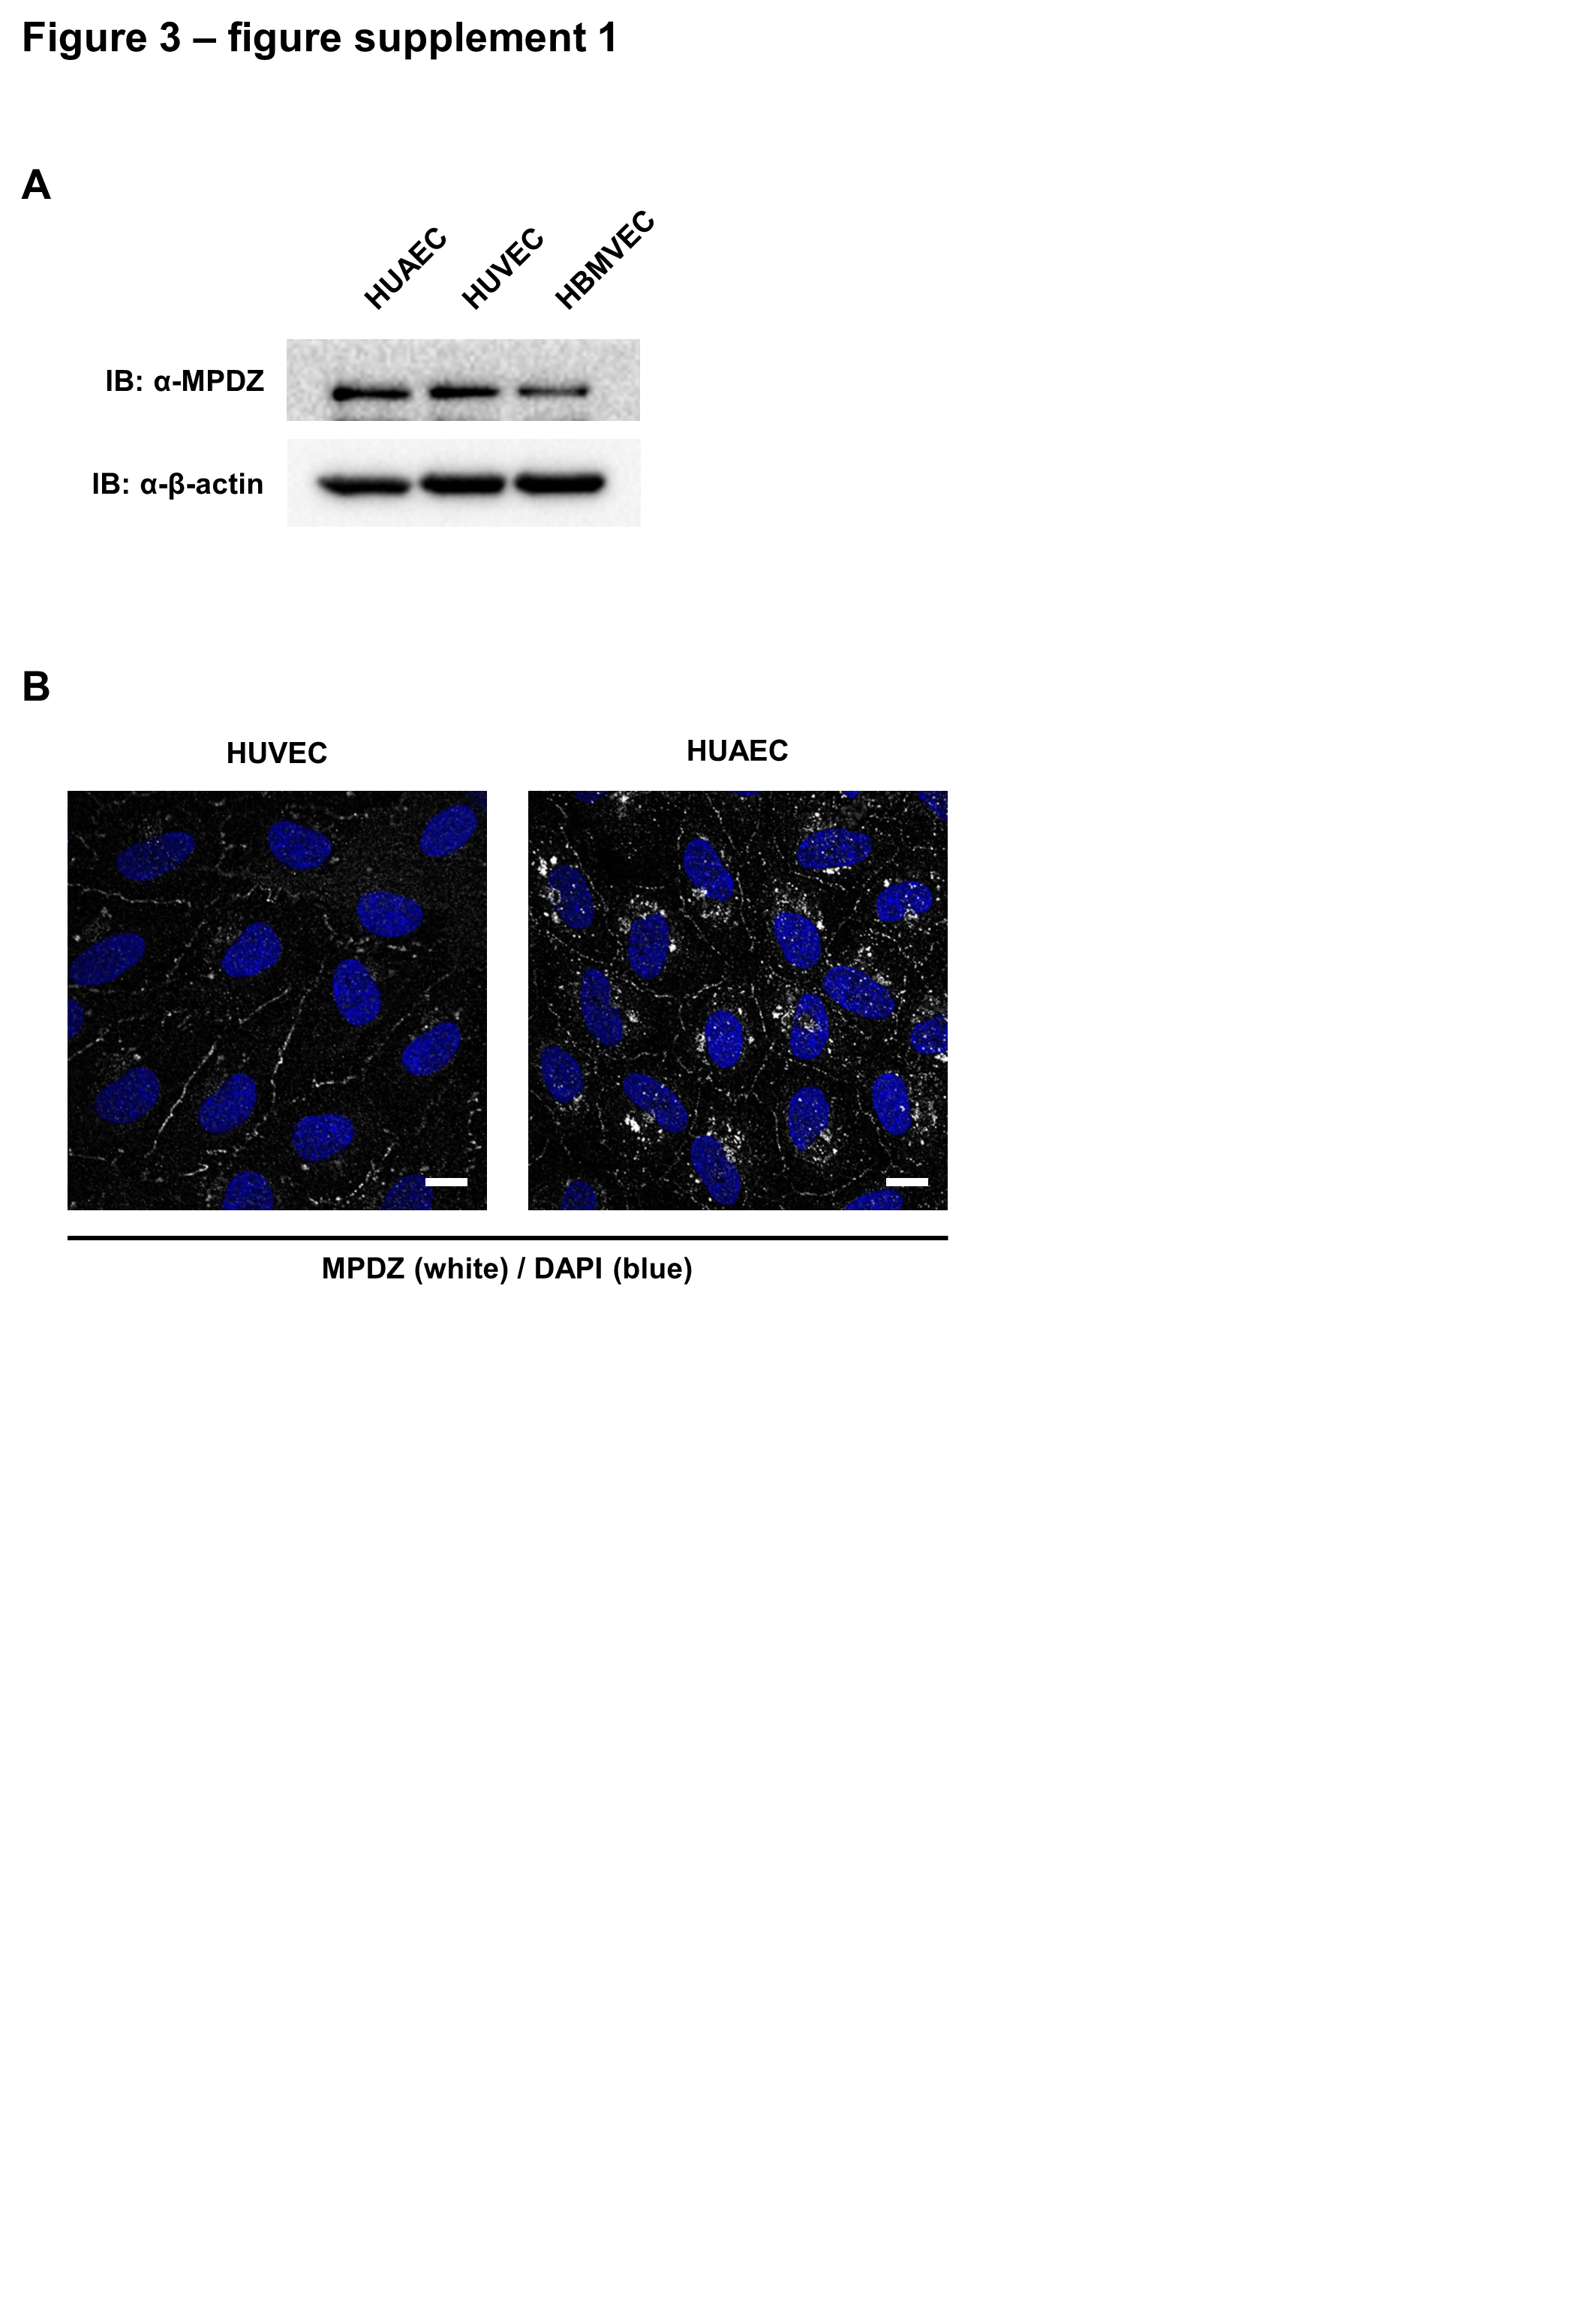

Supplement: supp [file elife-32860-supp-v1.zip › elife_poa_e32860_Figure_3_figure_supplement_1.tif]

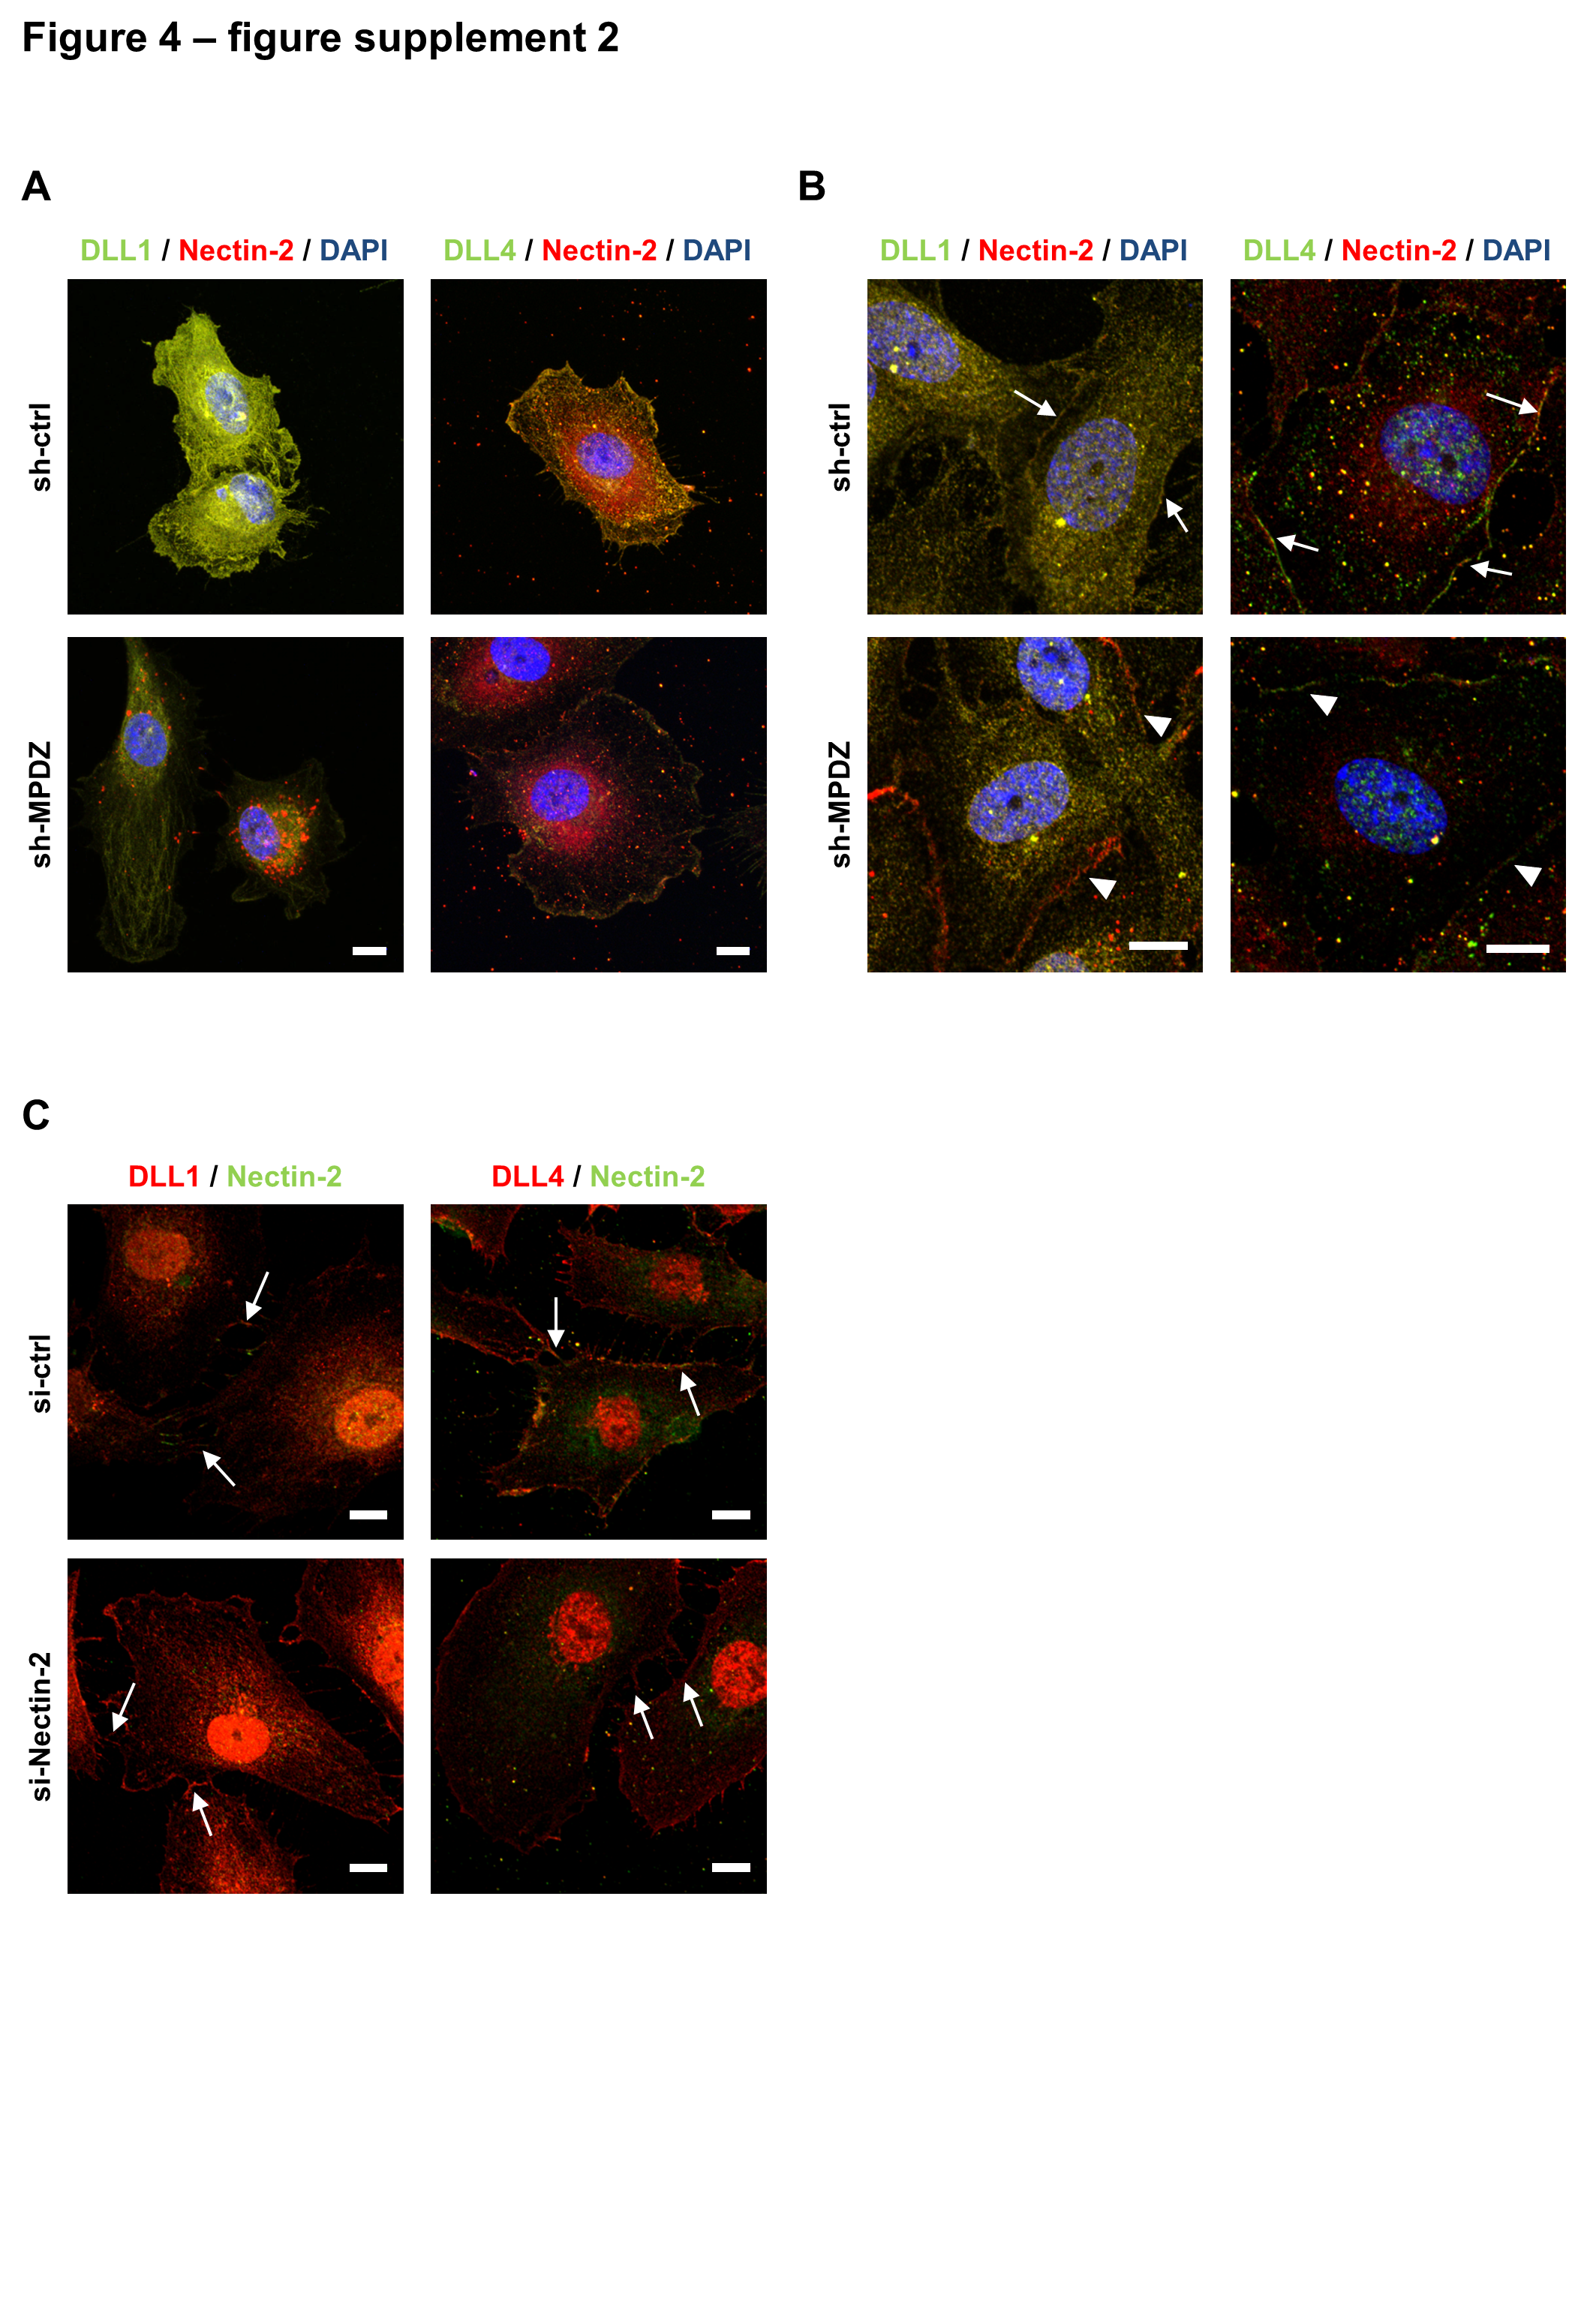

Supplement: supp [file elife-32860-supp-v1.zip › elife_poa_e32860_Figure_4_figure_supplement_2.tif]

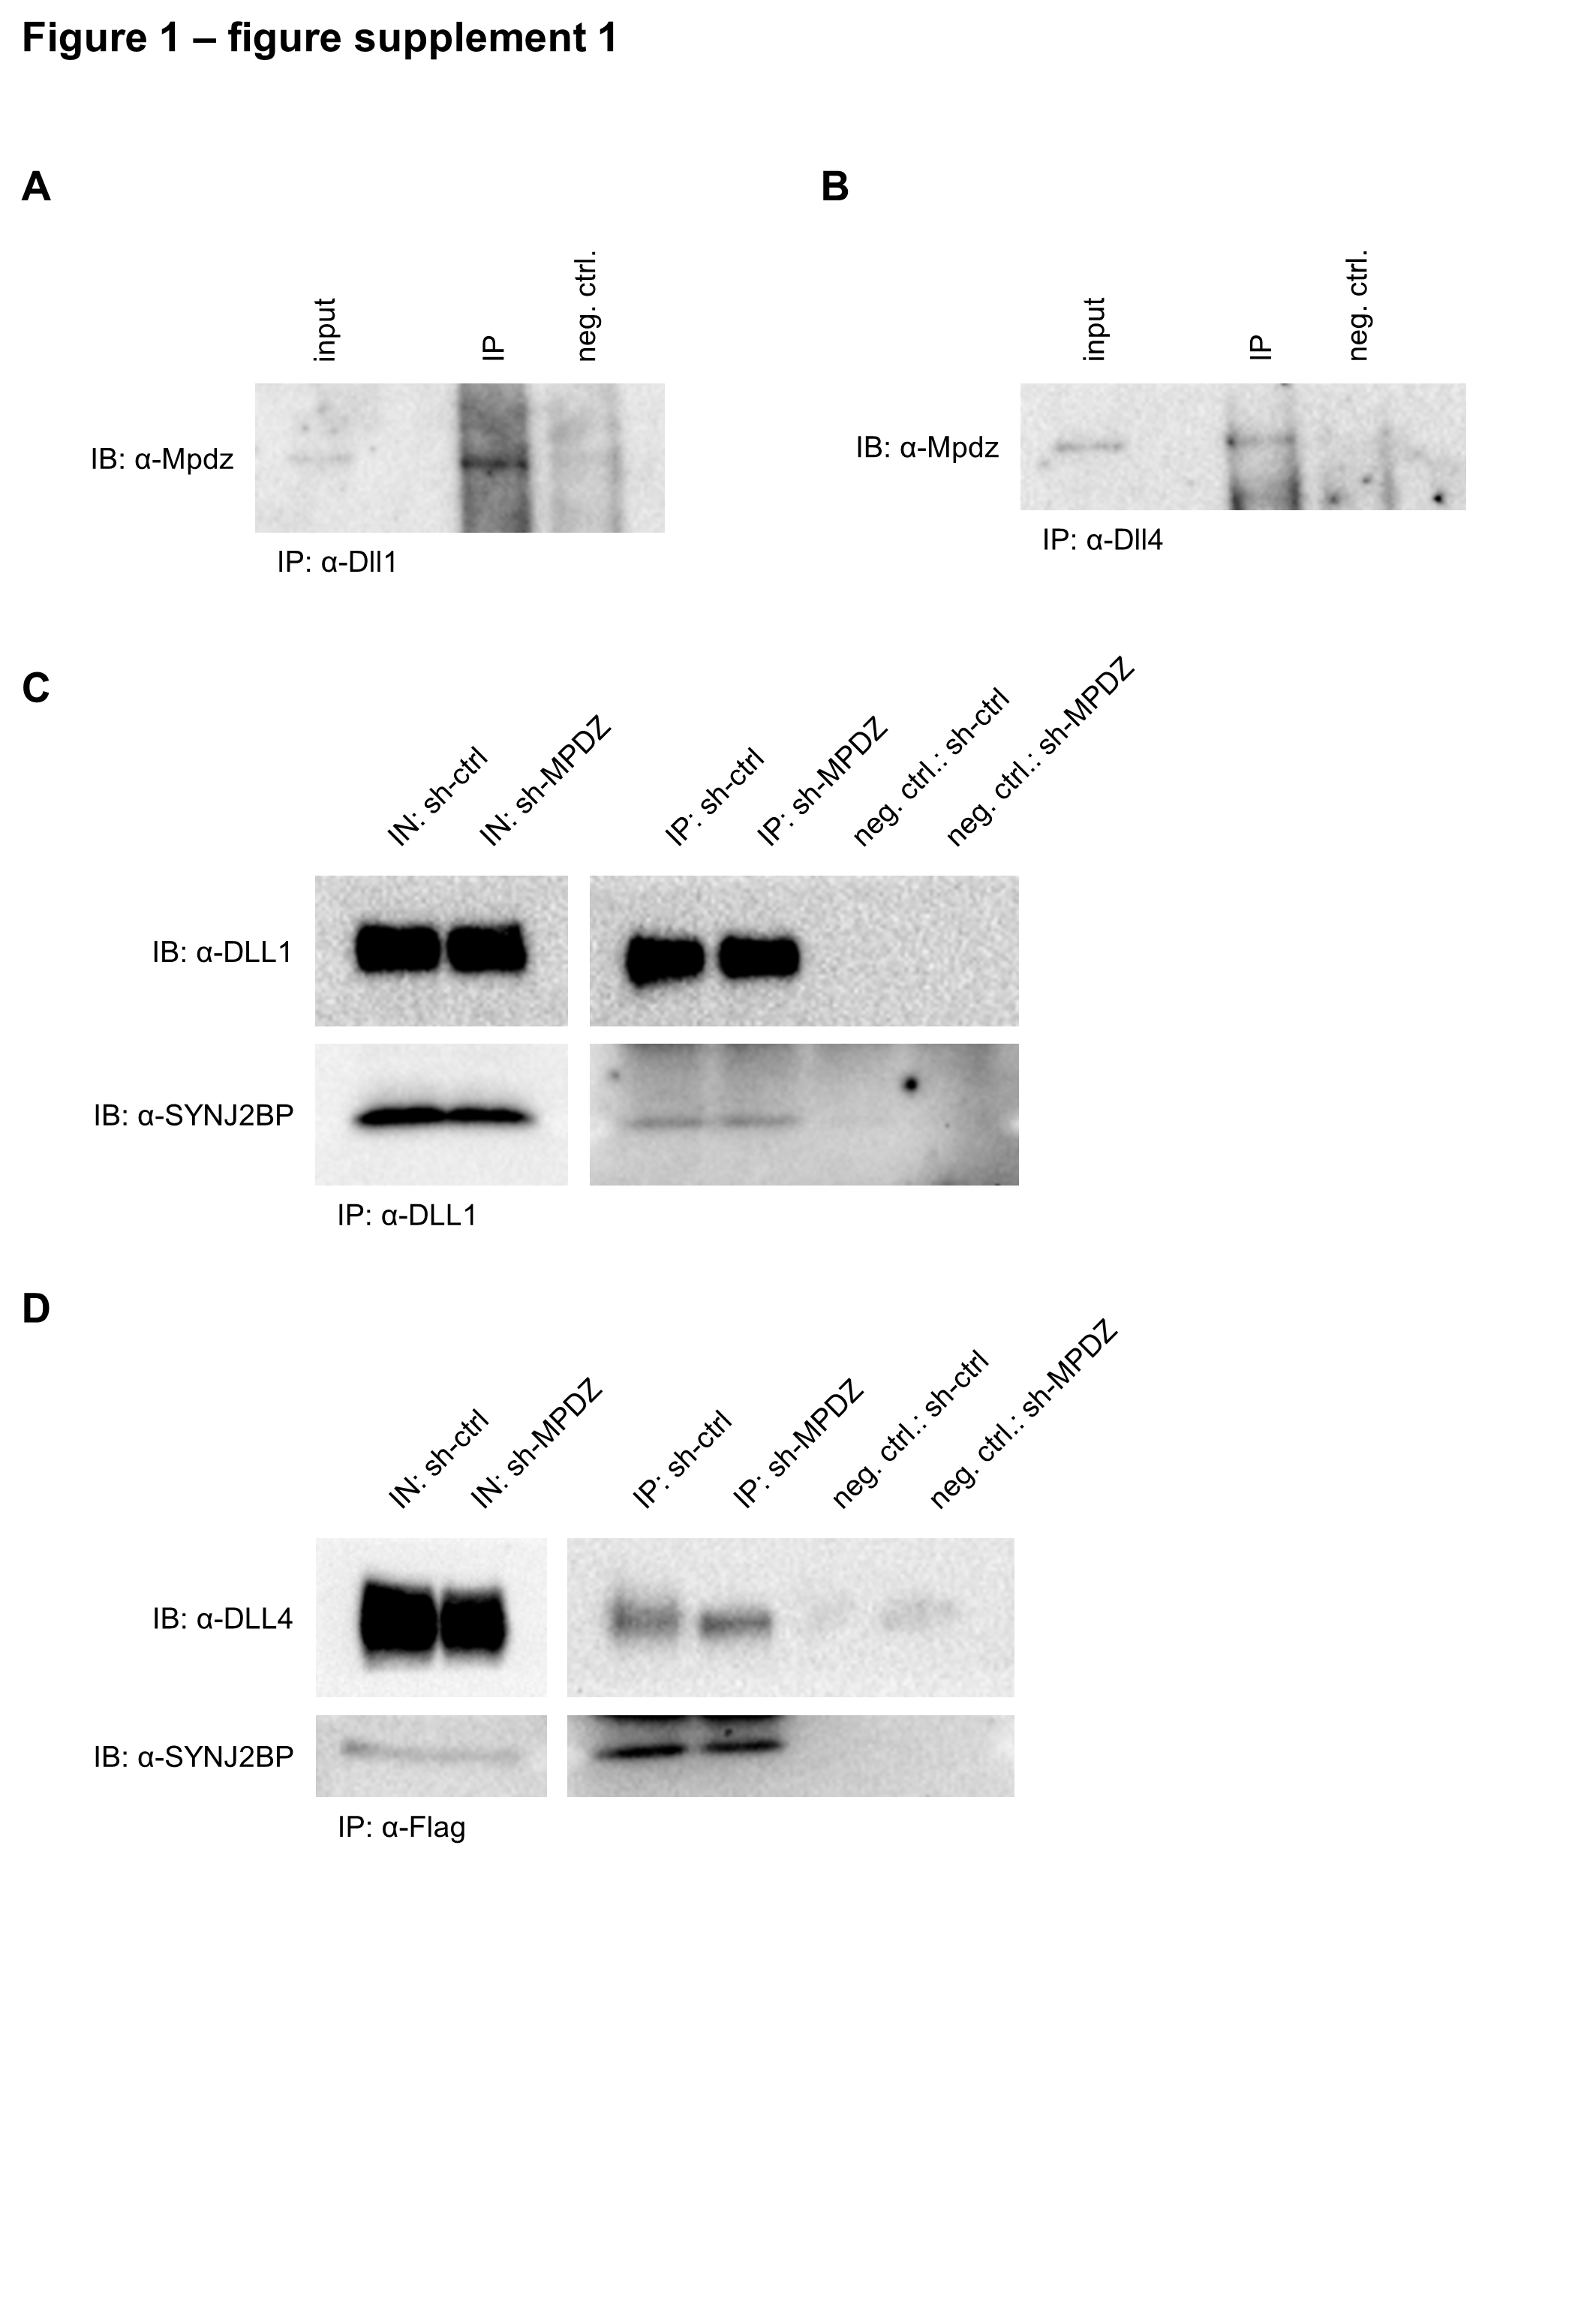

Supplement: supp [file elife-32860-supp-v1.zip › elife_poa_e32860_Figure_1_figure_supplement_1.tif]

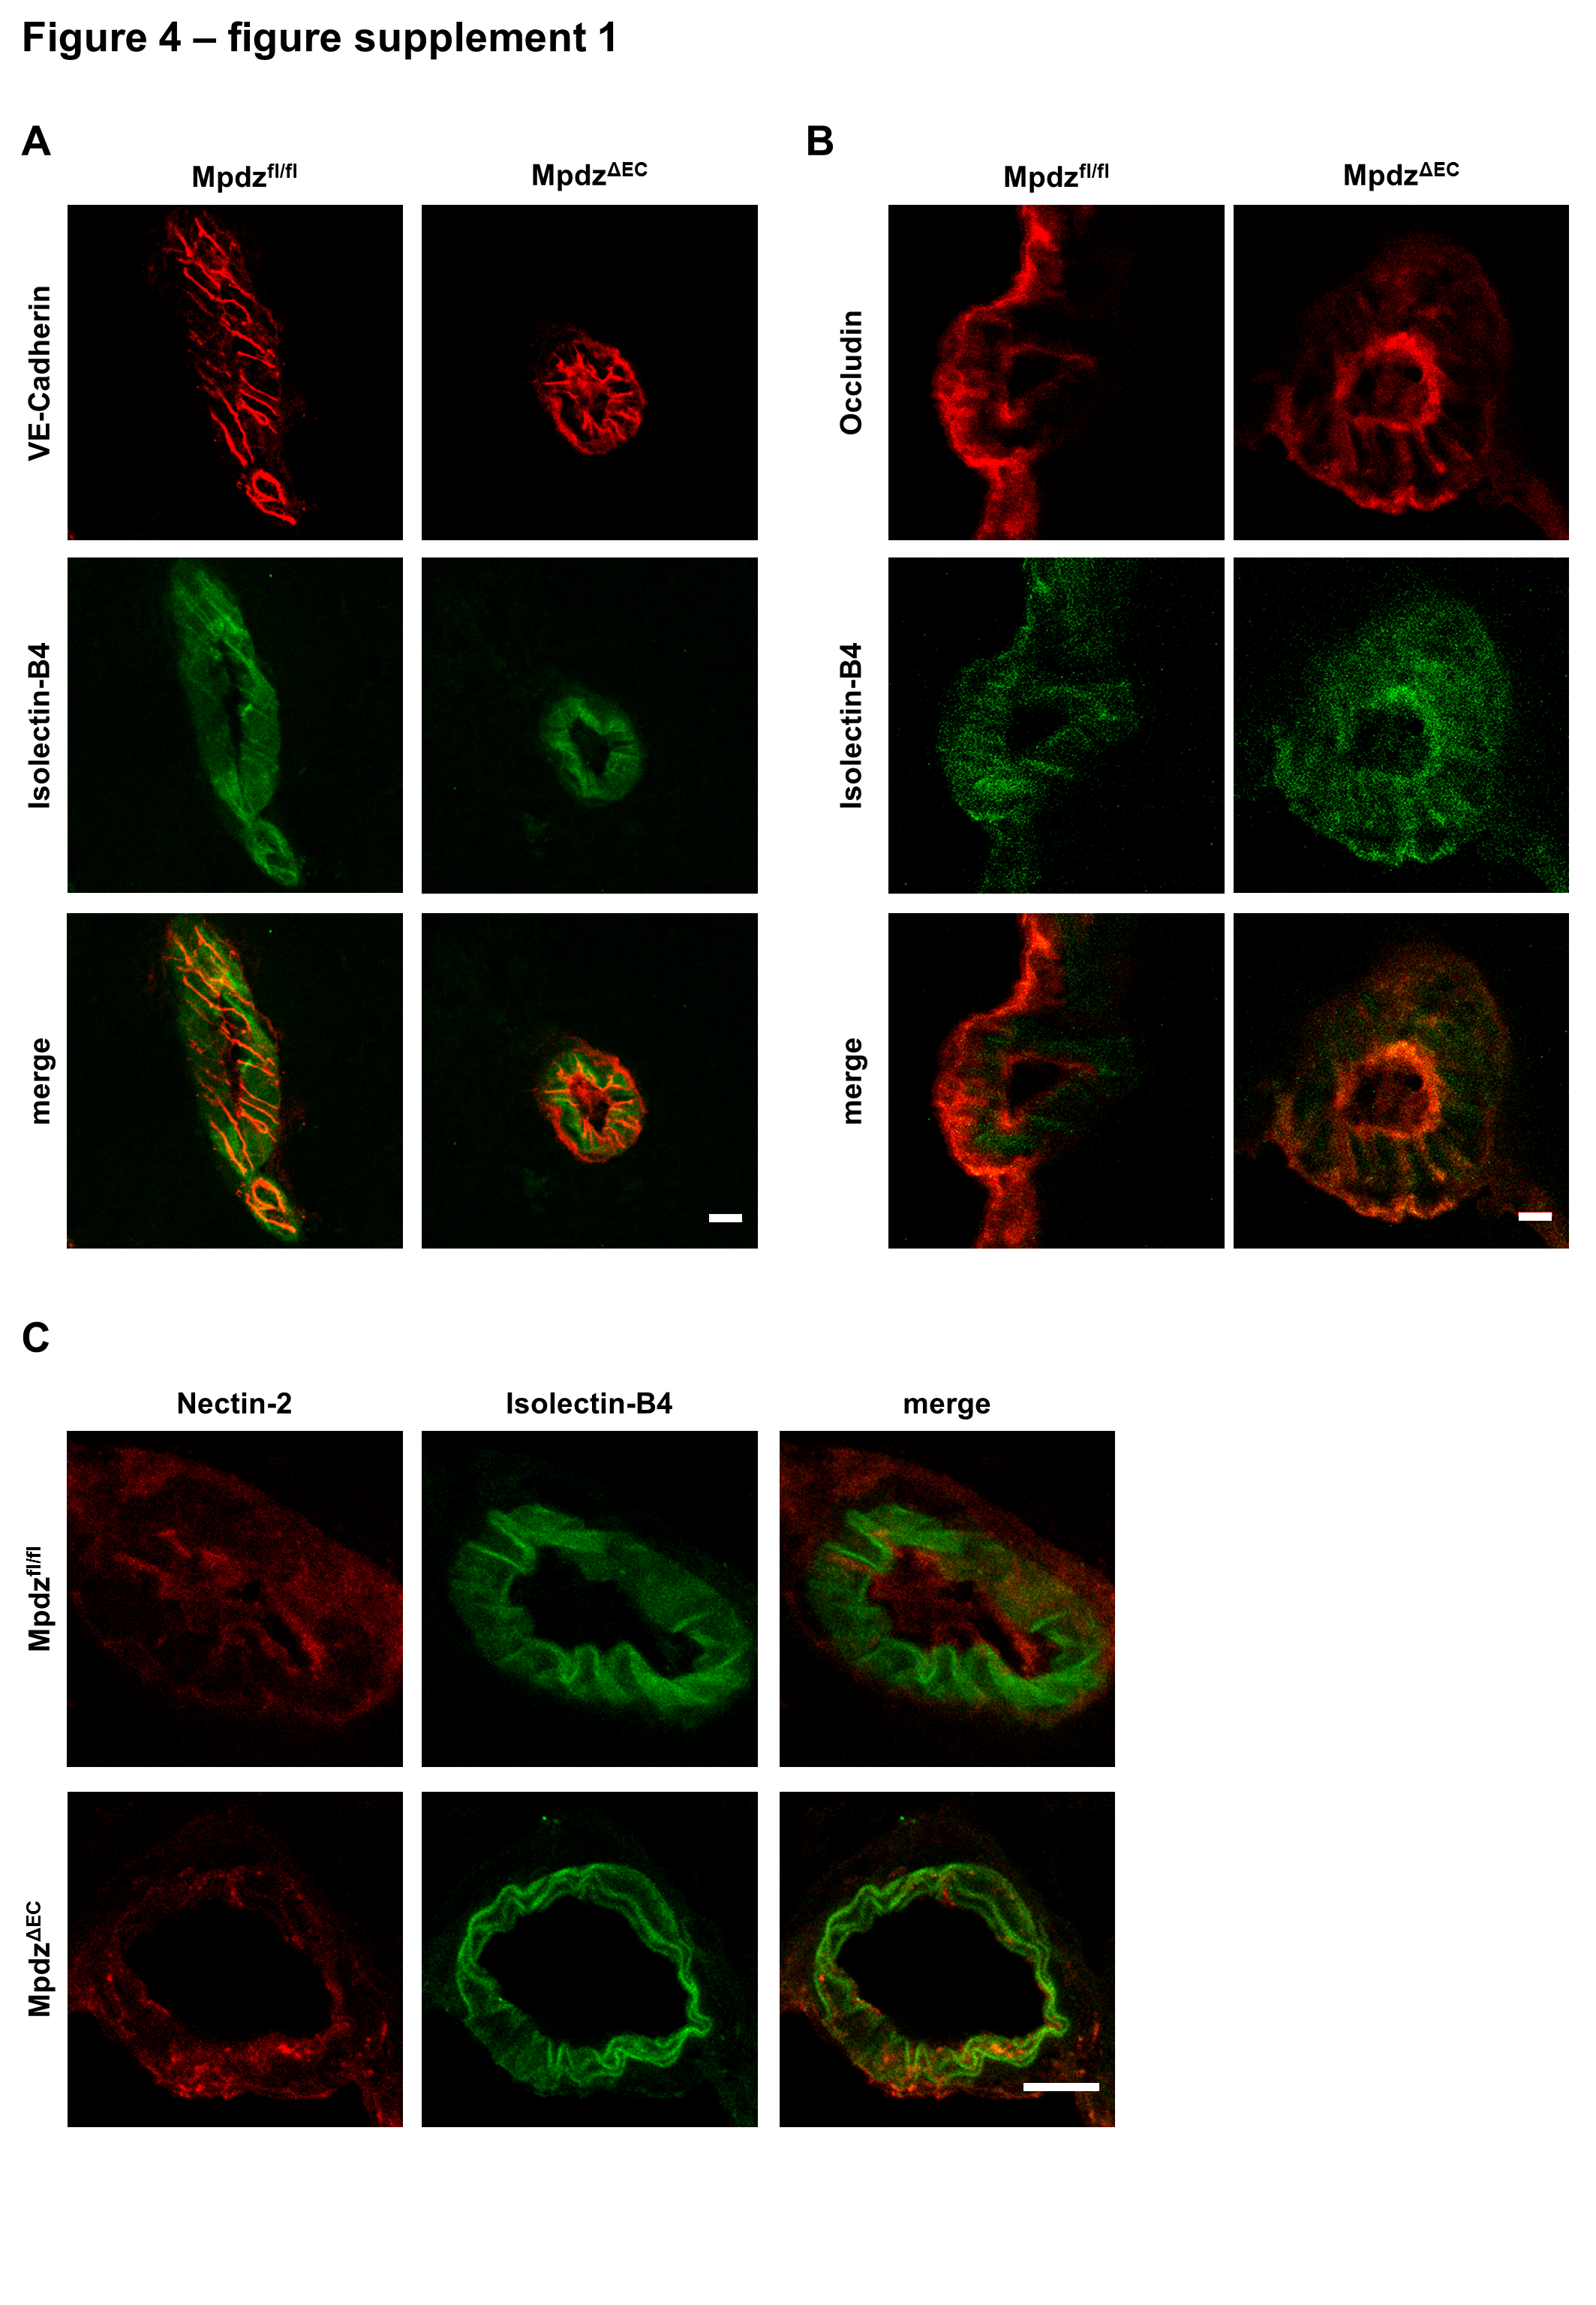

Supplement: supp [file elife-32860-supp-v1.zip › elife_poa_e32860_Figure_4_figure_supplement_1.tif]
